# Supplementary material for: Associations of White Matter Microstructure with Clinical and Demographic Characteristics in Heavy Drinkers
Source: PubMed Central journal article supplement (PMC4631485; doi:10.1371/journal.pone.0142042), 2015-11-03
Supplement: pone.0142042.s002.pdf [file pone.0142042.s002.pdf]

**S1 Table. Participant characteristics and FA values by moderator.**

|            | Treatment-seeking status |      |                   |      | Gender    |      |          |      | Smoking status |      |           |      | Age group |      |           |      | Comorbidity |      |           |      |
|------------|--------------------------|------|-------------------|------|-----------|------|----------|------|----------------|------|-----------|------|-----------|------|-----------|------|-------------|------|-----------|------|
|            | Treatment-naïve          |      | Treatment-seeking |      | Male      |      | Female   |      | Non-smoker     |      | Smoker    |      | Younger   |      | Older     |      | Low         |      | High      |      |
|            | (n = 189)                |      | (n = 114)         |      | (n = 211) |      | (n = 92) |      | (n = 141)      |      | (n = 161) |      | (n = 149) |      | (n = 154) |      | (n = 185)   |      | (n = 112) |      |
|            | M                        | SD   | M                 | SD   | M         | SD   | M        | SD   | M              | SD   | M         | SD   | M         | SD   | M         | SD   | M           | SD   | M         | SD   |
| Age        | 26.4*                    | 5.6  | 38.3*             | 8.9  | 31.0      | 9.1  | 30.8     | 9.0  | 31.0           | 9.6  | 30.7      | 8.6  | 23.6*     | 1.9  | 37.9*     | 7.7  | 30.6        | 9.4  | 31.8      | 8.6  |
| % male     | 71                       | —    | 67                | —    | 100       | —    | 0        | —    | 67             | —    | 72        | —    | 69        | —    | 71        | —    | 72          | —    | 66        | —    |
| Education  | 15.0*                    | 2.6  | 13.5*             | 2.0  | 14.3      | 2.5  | 14.7     | 2.4  | 14.8*          | 2.5  | 14.1*     | 2.5  | 14.9*     | 2.7  | 13.9*     | 2.2  | 14.8*       | 2.2  | 13.8*     | 2.8  |
| NYD        | 8.1*                     | 5.8  | 17.7*             | 9.6  | 12.1      | 9.1  | 10.8     | 8.1  | 11.2           | 8.9  | 12.0      | 8.6  | 5.5*      | 2.8  | 17.7*     | 8.4  | 11.2        | 8.9  | 12.8      | 8.5  |
| ADS        | 10.0*                    | 5.6  | 17.7*             | 8.9  | 12.7      | 7.8  | 14.1     | 8.7  | 11.8*          | 7.8  | 14.3*     | 8.2  | 10.6*     | 6.1  | 15.4*     | 8.9  | 10.3*       | 6.4  | 17.5*     | 8.5  |
| AUDIT      | 15.1*                    | 6.1  | 23.7*             | 6.8  | 18.8      | 7.4  | 17.9     | 8.1  | 17.0*          | 7.7  | 19.8*     | 7.4  | 15.6*     | 6.4  | 21.3*     | 7.7  | 16.0*       | 6.8  | 22.7*     | 7.0  |
| ICS        | 33.6*                    | 17.3 | 61.6*             | 13.5 | 44.3      | 20.7 | 45.8     | 21.8 | 41.9*          | 21.2 | 47.1*     | 20.5 | 35.0*     | 19.0 | 53.7*     | 18.6 | 37.9*       | 19.5 | 55.8*     | 18.6 |
| DPDD       | 5.9*                     | 2.5  | 8.9*              | 5.5  | 7.7*      | 4.6  | 5.8*     | 3.3  | 6.8            | 4.9  | 7.4       | 3.7  | 5.7*      | 2.3  | 8.4*      | 5.2  | 6.3*        | 3.1  | 8.4*      | 5.4  |
| PDD        | 0.53*                    | 0.22 | 0.69*             | 0.27 | 0.60      | 0.25 | 0.57     | 0.26 | 0.59           | 0.26 | 0.59      | 0.25 | 0.51*     | 0.21 | 0.67*     | 0.26 | 0.57        | 0.26 | 0.63      | 0.25 |
| PHDD       | 0.34*                    | 0.20 | 0.58*             | 0.32 | 0.45      | 0.29 | 0.41     | 0.28 | 0.41           | 0.29 | 0.45      | 0.27 | 0.32*     | 0.20 | 0.56*     | 0.31 | 0.40*       | 0.28 | 0.49*     | 0.28 |
| Last drink | 2.2*                     | 1.4  | 3.1*              | 4.5  | 2.6       | 3.2  | 2.4      | 2.9  | 2.7            | 2.8  | 2.4       | 3.3  | 2.4       | 2.8  | 2.7       | 3.4  | 2.5         | 3.2  | 2.6       | 3.0  |
| BCC        | 0.72                     | 0.03 | 0.71              | 0.03 | 0.72      | 0.03 | 0.72     | 0.03 | 0.72           | 0.03 | 0.72      | 0.03 | 0.73      | 0.02 | 0.71      | 0.04 | 0.72        | 0.03 | 0.72      | 0.03 |
| Fornix     | 0.50                     | 0.06 | 0.45              | 0.07 | 0.48      | 0.07 | 0.49     | 0.07 | 0.48           | 0.07 | 0.49      | 0.07 | 0.51      | 0.06 | 0.46      | 0.07 | 0.49        | 0.07 | 0.49      | 0.07 |
| ECR        | 0.47                     | 0.02 | 0.47              | 0.03 | 0.47      | 0.02 | 0.47     | 0.02 | 0.47           | 0.02 | 0.47      | 0.02 | 0.47      | 0.02 | 0.47      | 0.03 | 0.47        | 0.02 | 0.47      | 0.03 |
| ECL        | 0.51                     | 0.02 | 0.51              | 0.03 | 0.51      | 0.03 | 0.51     | 0.03 | 0.51           | 0.03 | 0.51      | 0.03 | 0.51      | 0.02 | 0.51      | 0.03 | 0.51        | 0.03 | 0.51      | 0.03 |
| CGR        | 0.60                     | 0.04 | 0.59              | 0.03 | 0.60      | 0.04 | 0.58     | 0.03 | 0.60           | 0.03 | 0.60      | 0.04 | 0.60      | 0.04 | 0.59      | 0.04 | 0.60        | 0.04 | 0.60      | 0.04 |
| CGL        | 0.66                     | 0.03 | 0.65              | 0.04 | 0.66      | 0.03 | 0.64     | 0.04 | 0.66           | 0.03 | 0.66      | 0.04 | 0.66      | 0.03 | 0.65      | 0.04 | 0.66        | 0.04 | 0.66      | 0.04 |
| SLFR       | 0.52                     | 0.03 | 0.50              | 0.03 | 0.51      | 0.03 | 0.51     | 0.03 | 0.51           | 0.03 | 0.51      | 0.03 | 0.52      | 0.03 | 0.51      | 0.03 | 0.52        | 0.03 | 0.52      | 0.03 |
| SLFL       | 0.55                     | 0.03 | 0.54              | 0.03 | 0.55      | 0.03 | 0.54     | 0.03 | 0.55           | 0.03 | 0.55      | 0.03 | 0.55      | 0.03 | 0.54      | 0.03 | 0.55        | 0.03 | 0.55      | 0.03 |
