# Supplementary material for: Associations of White Matter Microstructure with Clinical and Demographic Characteristics in Heavy Drinkers
Source: PubMed Central journal article supplement (PMC4631485; doi:10.1371/journal.pone.0142042), 2015-11-03
Supplement: pone.0142042.s003.pdf [file pone.0142042.s003.pdf]

**S2 Table. Variance-Covariance Matrix for Confirmatory Factor Analysis of the White Matter Factor (WMF).**

|                                         | Body of corpus callosum | Fornix | External capsule, right | External capsule, left | Cingulate gyrus, right | Cingulate gyrus, left | Superior longitudinal fasciculus, right | Superior longitudinal fasciculus, left |
|-----------------------------------------|-------------------------|--------|-------------------------|------------------------|------------------------|-----------------------|-----------------------------------------|----------------------------------------|
| Body of corpus callosum                 | 9.684                   | —      | —                       | —                      | —                      | —                     | —                                       | —                                      |
| Fornix                                  | 10.207                  | 47.541 | —                       | —                      | —                      | —                     | —                                       | —                                      |
| External capsule, right                 | 2.636                   | 3.634  | 5.583                   | —                      | —                      | —                     | —                                       | —                                      |
| External capsule, left                  | 2.446                   | 2.175  | 4.734                   | 6.562                  | —                      | —                     | —                                       | —                                      |
| Cingulate gyrus, right                  | 4.535                   | 7.315  | 4.064                   | 3.822                  | 12.379                 | —                     | —                                       | —                                      |
| Cingulate gyrus, left                   | 5.197                   | 7.816  | 4.158                   | 3.941                  | 9.960                  | 12.784                | —                                       | —                                      |
| Superior longitudinal fasciculus, right | 3.362                   | 4.953  | 3.693                   | 2.980                  | 5.488                  | 5.523                 | 8.081                                   | —                                      |
| Superior longitudinal fasciculus, left  | 3.452                   | 3.861  | 3.642                   | 3.256                  | 5.307                  | 5.490                 | 6.329                                   | 7.467                                  |
